# Supplementary material
Source: HighWire-hosted journal article supplement (https://ijgc.bmj.com/highwire/filestream/28356/field_highwire_adjunct_files/0/ijgc-2022-004026supp001_data_supplement.pdf)

# Supplemental Figure 1

## Statistical analysis plan.

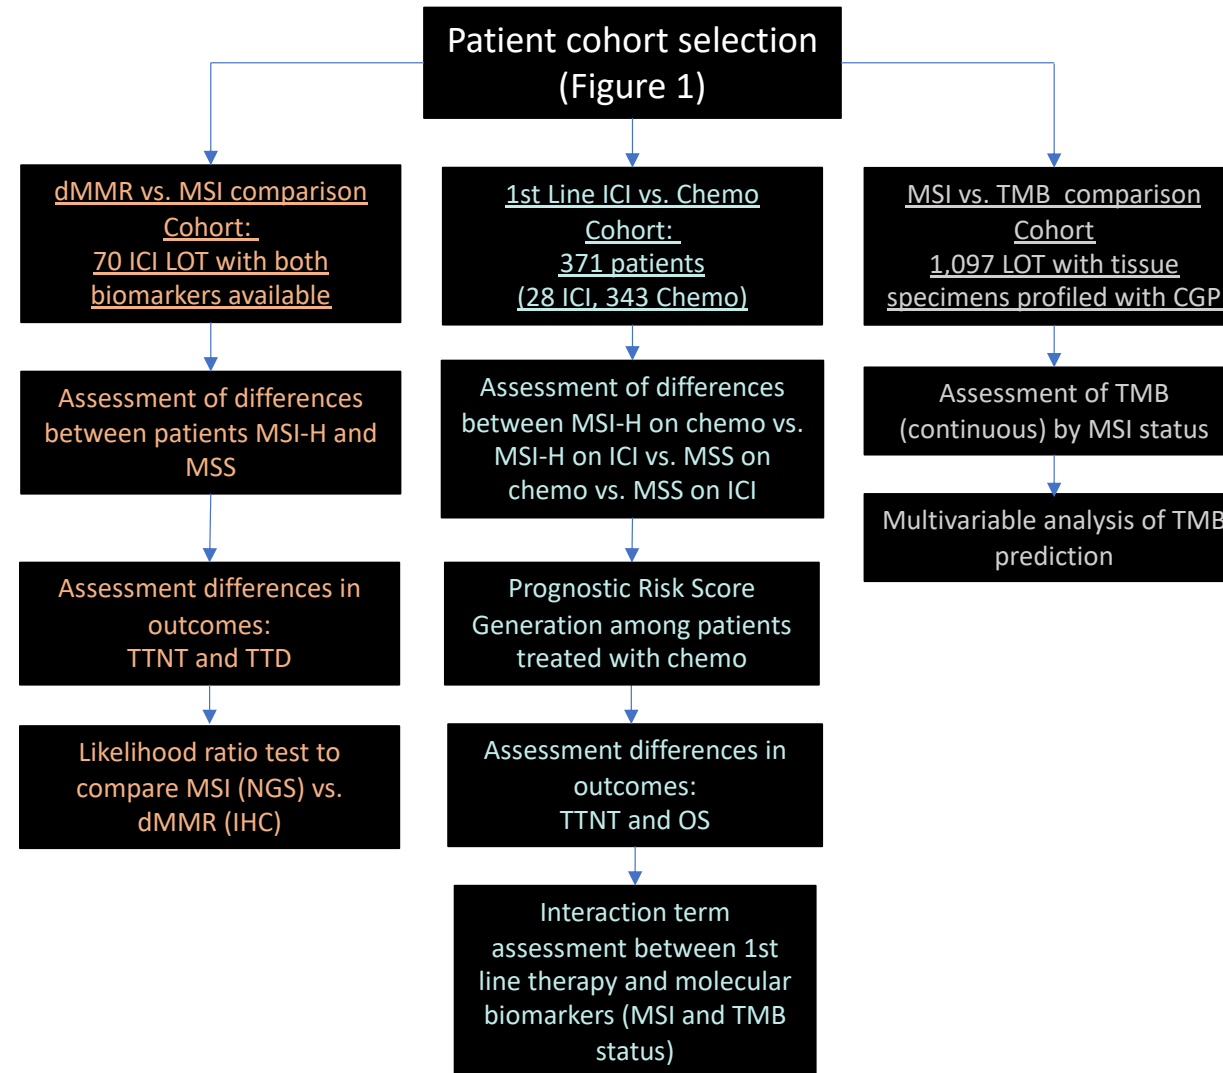

Supplement: ijgc-2022-004026supp001_data_supplement.pdf [file ijgc-2022-004026supp001_data_supplement.pdf]
